# Supplementary material for: Ionic liquid ion exchange: exclusion from strong interactions condemns cations to the most weakly interacting anions and dictates reaction equilibrium
Source: Royal Society of Chemistry journal article supplement (doi:10.1039/c8gc01869c), 2018-01-01
Supplement: c8gc01869c1.pdf [file c8gc01869c1.pdf]

Supporting information for '**Ionic liquid ion exchange: exclusion from strong interactions  
condemns cations to the most weakly interacting anions and dictates reaction equilibrium**'

Table SI1. Anion exchange (%) for 1 mmol anion added as sodium salt in MilliQ-water (5mL) to 1 mmol ionic liquid

Table SI2. Anion exchange (%) for 1 mmol anion added as sodium salt to 1 mmol trihexyl(tetradecyl)phosphonium ionic liquid

Table SI3. Anion exchange (%) for 1 mmol anion added as sodium salt to 1 mmol 1-butyl-3-methylimidazolium ionic liquid

Table SI4. Anion exchange (%) in function of time for 1 mmol  $\text{NaNO}_3$  added to 1 mmol trihexyl(tetradecyl)phosphonium chloride.

Table SI1. Anion exchange (%) for 1 mmol anion added as sodium salt in MilliQ-water (5mL) to 1 mmol ionic liquid. Averages and standard deviations of three replicates.

|                  | P <sub>666,14</sub> Cl | P <sub>666,14</sub> NO <sub>3</sub> | P <sub>666,14</sub> ClO <sub>4</sub> |
|------------------|------------------------|-------------------------------------|--------------------------------------|
| Cl               | \                      | 8.2 ± 0.3                           | 0.1 ± 0.0                            |
| OAc              | 20.1 ± 3.1             | 3.8 ± 0.9                           | 1.6 ± 1.5                            |
| NO <sub>3</sub>  | 90.3 ± 1.9             | \                                   | 0.1 ± 0.5                            |
| I                | 96.1 ± 0.6             | 80.8 ± 2.5                          | 12.7 ± 0.6                           |
| ClO <sub>4</sub> | 98.1 ± 1.3             | 98.7 ± 1.4                          | ND                                   |

Table SI2. Anion exchange (%) for 1 mmol anion added as sodium salt to 1 mmol trihexyl(tetradecyl)phosphonium ionic liquid. Averages and standard deviations for three replicates.

|                  | P <sub>666,14</sub> Cl | P <sub>666,14</sub> NO <sub>3</sub> | P <sub>666,14</sub> ClO <sub>4</sub> |
|------------------|------------------------|-------------------------------------|--------------------------------------|
| Cl               | \                      | 1.9 ± 0.6%                          | 2.0 ± 1.8%                           |
| OAc              | 18.7 ± 1.4%            | 20.7 ± 2.1%                         | 2.7 ± 3.0%                           |
| NO <sub>3</sub>  | 28.9 ± 0.6%            | \                                   | 0.7 ± 1.3%                           |
| I                | 97.7 ± 4.0%            | 82.0 ± 4.6%                         | 36.8 ± 3.8%                          |
| ClO <sub>4</sub> | 100.5 ± 3.2%           | 93.8 ± 3.4%                         | ND                                   |

Table SI3. Anion exchange (%) for 1 mmol anion added as sodium salt to 1 mmol 1-butyl-3-methylimidazolium ionic liquid. Averages and standard deviations for three replicates.

|                  | Bmim Cl     | Bmim NO <sub>3</sub> | Bmim ClO <sub>4</sub> |
|------------------|-------------|----------------------|-----------------------|
| Cl               | \           | 5.2 ± 3.0%           | 0                     |
| OAc              | 60.0 ± 0.4% | 25.4 ± 0.4%          | 7.1 ± 0.1%            |
| NO <sub>3</sub>  | 94.1 ± 1.1% | \                    | 1.6 ± 0.3%            |
| I                | 96.3 ± 1.8% | 80.8 ± 0.9%          | 33.5 ± 5.0%           |
| ClO <sub>4</sub> | 98.1 ± 0.7% | 86.9 ± 0.7%          | ND                    |

Table SI4. Anion exchange (%) in function of time for 1 mmol NaNO<sub>3</sub> added to 1 mmol trihexyl(tetradecyl)phosphonium chloride. Averages and standard deviations for three replicates.

| Time (sec) | Anion exchange (%) |
|------------|--------------------|
| 5          | 89.1 ± 0.9         |
| 30         | 88.0 ± 0.3         |
| 60         | 88.0 ± 2.8         |
| 120        | 90.9 ± 1.5         |
| 300        | 92.3 ± 1.8         |
| 600        | 93.2 ± 2.5         |

Table SI5. Conversion of esterification of acetic acid to ethyl acetate (0.33 mmol acetic acid, 3 eq. ethanol, 0.1 eq. sulfuric acid, 75 °C, 2 hours) in 6 different anion trihexyl(tetradecyl)phosphonium ionic liquids (1 mmol), and amount of free acetic acid detected after anion exchange in the same conditions, without ethanol

|                                      | Esterification (%) | Free acetic acid after anion exchange (%) |
|--------------------------------------|--------------------|-------------------------------------------|
| P <sub>666,14</sub> Cl               | 15.4 ± 3.8         | 46.0 ± 1.3                                |
| P <sub>666,14</sub> NO <sub>3</sub>  | 38.9 ± 2.5         | 57.6 ± 0.6                                |
| P <sub>666,14</sub> HSO <sub>4</sub> | 56.7 ± 3.4         | 57.7 ± 0.2                                |
| P <sub>666,14</sub> SCN              | 65.1 ± 5.2         | 67.6 ± 1.8                                |
| P <sub>666,14</sub> ClO <sub>4</sub> | 85.7 ± 1.6         | 102.0 ± 2.3                               |
| P <sub>666,14</sub> NTf <sub>2</sub> | 85.9 ± 1.3         | 105.8 ± 5.2                               |
